# Supplementary material for: A Meta-Analysis of Genome-Wide Association Scans Identifies IL18RAP, PTPN2, TAGAP, and PUS10 As Shared Risk Loci for Crohn's Disease and Celiac Disease
Source: PLOS journal article supplement (doi:10.1371/journal.pgen.1001283), 2011-01-27
Supplement: S4 (10.1371/journal.pgen.1001283.s004) [file journal.pgen.1001283.s004]

## Sheet: supltable_20100928
	LOCUS				ALLELES		P-values
	REGION	SNP	CHR	POSITION	RISK	OTHER	CD	CelD	Meta
	PUS10	rs10188217	2	61129193	C	T	6.14197e-06	0.008301	3.32619e-06
	IL18RAP	rs13015714	2	102430383	G	T	0.000162647	0.0003083	1.65694e-06
		rs1035127	2	102478437	A	G	0.000122569	0.0003271	1.38708e-06
		rs4851007	2	102483331	T	G	0.000210637	0.0003271	2.14584e-06
		rs1420106	2	102493562	A	G	0.000253295	0.0003271	2.49346e-06
		rs3755267	2	102497105	T	G	0.00014855	0.0003271	1.61831e-06
		rs2041756	2	102508428	A	G	3.24604e-05	8.063e-05	1.45857e-07
		rs6708413	2	102521887	G	A	2.04503e-05	6.497e-05	8.36522e-08
		rs7559479	2	102527305	G	A	3.03414e-05	6.497e-05	1.15004e-07
		rs917997	2	102529086	T	C	2.1688e-05	6.778e-05	9.09085e-08
		rs759382	2	102552731	G	T	0.000203465	0.001967	9.79268e-06
	3q13	rs1517605	3	108106984	T	C	0.000197964	0.00056	3.22012e-06
		rs1568206	3	108122409	C	G	0.000290238	0.001414	9.61632e-06
	TAGAP	rs1738074	6	159436386	T	C	0.00015305	0.001183	5.01308e-06
		rs212388	6	159460845	C	T	1.23037e-05	0.001219	7.86218e-07
	C10orf72	rs4317904	10	49964676	A	G	0.000279699	0.0002091	1.87163e-06
	CCDC91	rs2169755	12	28382424	G	C	6.45411e-05	0.002247	4.68956e-06
		rs1586868	12	28412376	T	C	7.36345e-05	0.004247	9.40499e-06
		rs1257741	12	28425836	C	G	5.62063e-05	0.002247	4.23696e-06
		rs10771427	12	28496693	G	A	5.71646e-05	0.002085	4.00106e-06
	KCNG4	rs40254	16	82806258	A	G	2.96705e-05	0.005692	6.58362e-06
	PTPN2	rs2542151	18	12769947	G	T	1.1891e-11	0.006003	6.12466e-10
		rs1893217	18	12799340	G	A	6.54476e-11	0.004388	1.12818e-09
		rs16939895	18	12811903	C	T	0.00206	4.62e-09	6.39e-09
		rs657555	18	12837136	C	T	3.02129e-09	0.006115	1.79507e-08
	FERMT1	rs6516104	20	6037513	T	C	0.000618572	5.874e-05	1.35657e-06
